# Supplementary material for: Nickel encapsulated in carbon-dot-derived nanosheets for efficient hydrogen evolution via urea-assisted water electrolysis
Source: Royal Society of Chemistry journal article supplement (doi:10.1039/d2qm01290a), 2023-01-01
Supplement: d2qm01290a1.pdf [file d2qm01290a1.pdf]

1 Nickel Encapsulated in Carbon Dots Derived  
2 Nanosheets for Efficient Urea-Assisted Water  
3 Electrolysis of Hydrogen Evolution

4 *Yichen Pan*<sup>†a</sup>, *Jiancheng Zhang*<sup>†a</sup>, *Qian Zhang*<sup>a</sup>, *Xin Chen*<sup>a</sup>, *Qian Wang*<sup>a</sup>, *Caicai Li*<sup>\*a</sup>,  
5 *Zonglin Liu*<sup>\*b</sup> and *Qingfeng Sun*<sup>\*a</sup>

6 <sup>a</sup>College of Chemistry and Materials Engineering, Zhejiang A&F University,  
7 Hangzhou, Zhejiang Province, 311300, PR China.

8 <sup>b</sup>Institute for Advanced Ceramics, State Key Laboratory of Urban Water Resource and  
9 Environment, Harbin Institute of Technology, Harbin, 150001, China.

10 <sup>†</sup>They are equally contributed to the paper.

11 **\*Corresponding authors:** Caicai Li (ccli@zafu.edu.cn); Zonglin Liu  
12 (liuzonglin\_yoo@163.com); Qingfeng Sun (qfsun@zafu.edu.cn)

## 1 Materials and chemicals

2 Citric acid monohydrate ( $C_6H_8O_7 \cdot H_2O$ ) and ethylenediamine (EDA) were  
3 obtained from Sinopharm Group Chemical Reagent (Shanghai, China).  
4 Nickel(II) acetate tetrahydrate ( $Ni(OAc)_2$ ) was purchased from Aladdin  
5 (Shanghai, China). All reagents were utilized without additional purification, and  
6 ultrapure water was utilized throughout the experiments.

7

8

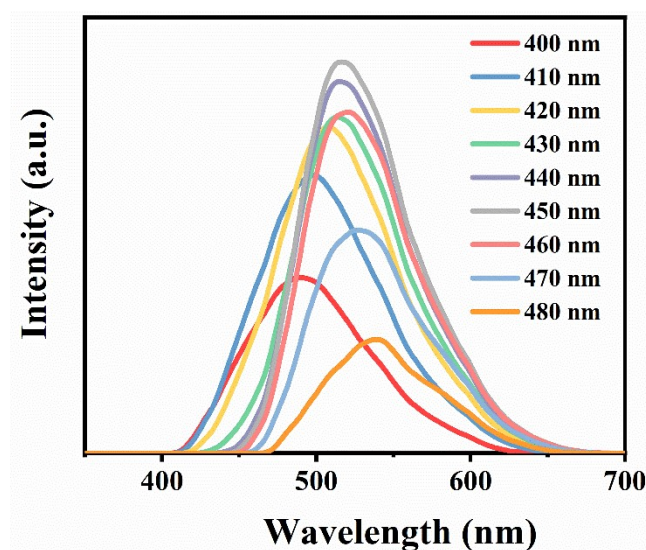

9

10 **Figure S1.** NCDs in ultrapure water at different excitation wavelengths (in 10 nm  
11 increments starting from 400 nm to 480 nm).

12

13

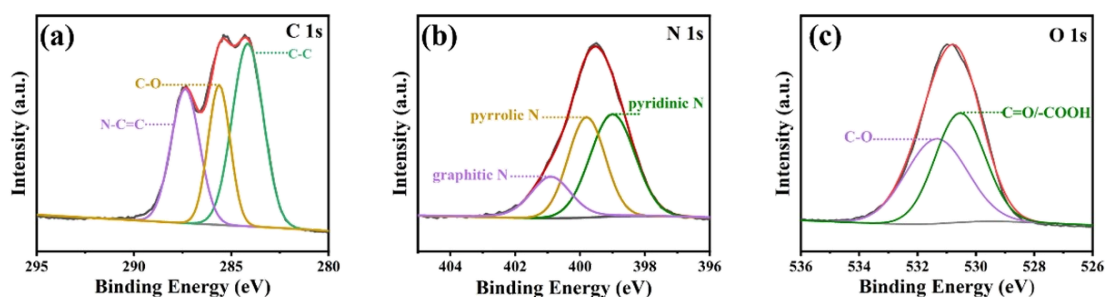

14

15 **Figure S2.** High XPS spectra of (a) C 1s, (b) N 1s, and (c) O 1s of NCDs.

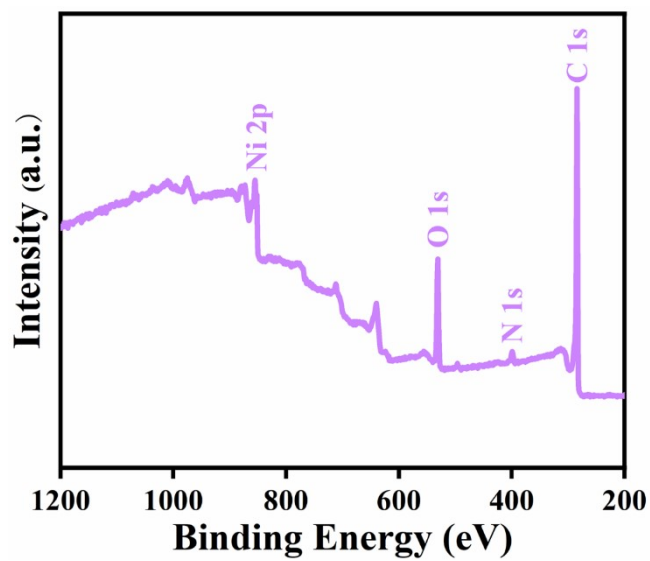

1  
2  
3  
4

**Figure S3.** XPS survey spectrum of Ni@NCDs.

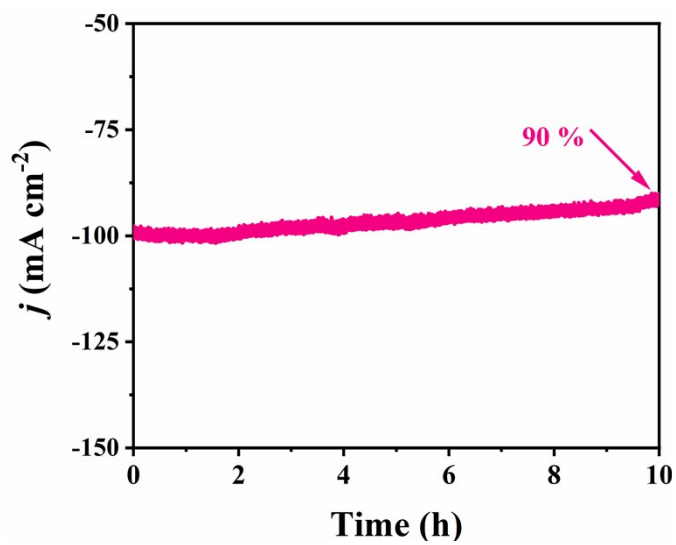

5  
6  
7  
8

**Figure S4.** The i-t test at a current density of 100 cm<sup>-2</sup>.

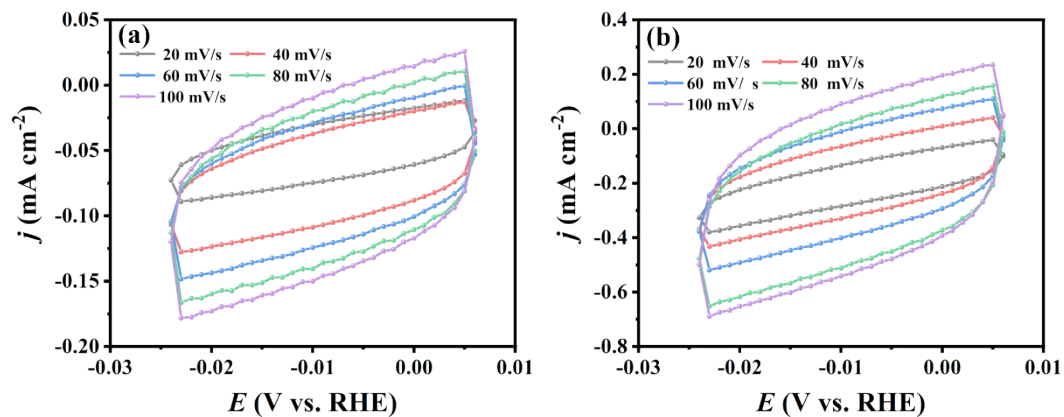

1

2 **Figure S5.** CV curves of NCDs-650 (a) and Ni (b) measured at different scan rates.

3

4

5

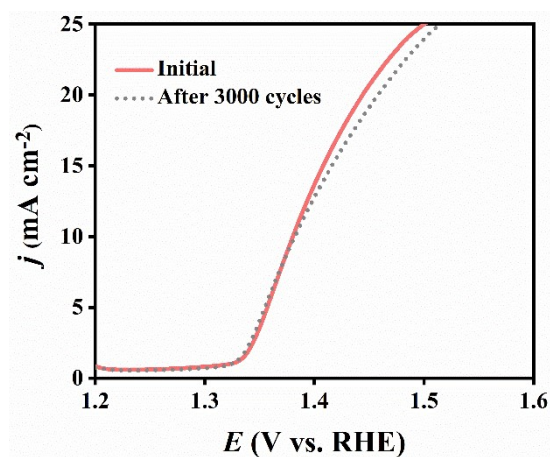

6

7 **Figure S6.** LSV curves for Ni@NCDs before and after 3000 CV cycles in 1.0 M  
8 KOH with 0.5 M urea.

9

10

11

12

13

1 **Table S1.** Comparison of the HER performance of Ni@NCDs with some recently  
 2 reported Ni-based catalysts in alkaline medium.

| Catalyst                                       | $\eta$ (mV) $@j$<br>(mA cm <sup>-2</sup> ) | Tafel slope<br>(mV dec <sup>-1</sup> ) | References                                                              |
|------------------------------------------------|--------------------------------------------|----------------------------------------|-------------------------------------------------------------------------|
| Ni-Cu alloy                                    | 128@10                                     | 57                                     | [1] <i>Electrochim. Acta</i> , 2016, <b>215</b> , 609-616.              |
| Ni-doped graphene                              | ~180@10                                    | 45                                     | [2] <i>Nat. Commun.</i> 2016, <b>7</b> , 10667.                         |
| NiO/Ni@CNT                                     | 80@10                                      | 82                                     | [3] <i>Nat. Commun.</i> 2014, <b>5</b> , 4695                           |
| Ni@SNG                                         | 99.8@10                                    | 98                                     | [4] <i>ACS Appl. Mater. Interfaces</i> , 2021, <b>13</b> , 4294-4304.   |
| Ni(OH) <sub>2</sub> /Ag hybrid                 | 89@10                                      | 102                                    | [5] <i>New J. Chem.</i> 2021, <b>45</b> , 13286-13292.                  |
| Ni@graphene defects                            | 270@10                                     | 47                                     | [6] <i>Chem</i> , 2018, <b>4</b> , 285-297.                             |
| Ni-N-C                                         | 83@10                                      | 100                                    | [7] <i>ACS Appl. Mater. Interfaces</i> , 2022, <b>14</b> , 29822-29831. |
| Ni/NiFe LDH                                    | 92@10                                      | 72                                     | [8] <i>J. Mater. Chem. A</i> , 2019, <b>7</b> , 21722-21729.            |
| Ni/Graphene                                    | 50@10                                      | 45                                     | [9] <i>Angew. Chem. Int. Ed.</i> 2015, <b>54</b> , 14031-14035.         |
| Ni/NiO hybrid                                  | 105@10                                     | 55                                     | [10] <i>J. Alloys Compd.</i> 2021, <b>853</b> , 157338.                 |
| Nanoprism NiO/oxygen vacancies                 | 115@10                                     | 146                                    | [11] <i>New J. Chem.</i> 2020, <b>44</b> , 1703-1706.                   |
| NiO <sub>x</sub> @bamboo-like carbon nanotubes | 79@10                                      | 119                                    | [12] <i>ACS Appl. Mater. Interfaces</i> , 2017, <b>9</b> , 7139-7147.   |
| <b>Ni@NCDs</b>                                 | <b>86@10</b>                               | <b>78.2</b>                            | <b>This work</b>                                                        |

1 **Table S2.** Comparison of the Ni@NCDs with recently reported catalysts for urea-  
 2 assisted water electrolysis.

| Catalyst                                               | Cell Voltage at 10<br>mA cm <sup>-2</sup> (V) | References                                                             |
|--------------------------------------------------------|-----------------------------------------------|------------------------------------------------------------------------|
| NiS/Ni <sub>3</sub> S <sub>4</sub> /GCW                | 1.44                                          | [13] <i>J. Colloid Interface Sci.</i> 2022, <b>626</b> , 848-857.      |
| NiS/MoS <sub>2</sub> @CC                               | 1.46                                          | [14] <i>Chem. Eng. J.</i> 2022, <b>443</b> , 136321                    |
| MZS/NF-180                                             | 1.51                                          | [15] <i>Renewable Energy</i> , 2022, <b>193</b> , 715-724.             |
| 8%Co:Ni-P-O/NF                                         | 1.48                                          | [16] <i>J. Alloys Compd.</i> 2022, <b>914</b> , 165362.                |
| CoS <sub>2</sub> -Ti                                   | 1.59                                          | [17] <i>Electrochim. Acta</i> , 2017, <b>246</b> , 776-782.            |
| Ni@NCNT                                                | 1.56                                          | [18] <i>Appl. Catal. B-Environ.</i> 2021, <b>280</b> , 119436.         |
| MnO <sub>2</sub> /MnCo <sub>2</sub> O <sub>4</sub> /Ni | 1.55                                          | [19] <i>J. Mater. Chem. A</i> , 2017, <b>5</b> , 7825-7832.            |
| Ni/C                                                   | 1.6                                           | [20] <i>ACS Appl. Mater. Interfaces</i> , 2018, <b>10</b> , 4750-4756. |
| HC-NiMoS/Ti                                            | 1.59                                          | [21] <i>Nano Res.</i> 2018, <b>11</b> , 988-996.                       |
| <b>Ni@NCDs</b>                                         | <b>1.47</b>                                   | <b>This work</b>                                                       |

3

4

5

## 1 **References**

- 2 [1] M. Y. Gao, C. Yang, Q. B. Zhang, Y. W. Yu, Y. X. Hua, Y. Li and P. Dong,  
3 Electrochemical fabrication of porous Ni-Cu alloy nanosheets with high catalytic  
4 activity for hydrogen evolution, *Electrochim. Acta*, 2016, **215**, 609-616.
- 5 [2] L. Fan, P. F. Liu, X. Yan, L. Gu, Z. Z. Yang, H. G. Yang, S. Qiu and X. Yao,  
6 Atomically isolated nickel species anchored on graphitized carbon for efficient  
7 hydrogen evolution electrocatalysis, *Nat. Commun.*, 2016, **7**, 10667.
- 8 [3] M. Gong, W. Zhou, M. C. Tsai, J. Zhou, M. Guan, M. C. Lin, B. Zhang, Y. Hu, D.  
9 Y. Wang, J. Yang, S. J. Pennycook, B. J. Hwang and H. Dai, Nanoscale nickel  
10 oxide/nickel heterostructures for active hydrogen evolution electrocatalysis, *Nat.*  
11 *Commun.*, 2014, **5**, 4695.
- 12 [4] C. Zhang, S. Ju, T. H. Kang, G. Park, B. J. Lee, H. Miao, Y. Wu, J. Yuan and J. S.  
13 Yu, Self-Limiting Growth of Single-Layer N-Doped Graphene Encapsulating  
14 Nickel Nanoparticles for Efficient Hydrogen Production, *ACS Appl. Mater.*  
15 *Interfaces*, 2021, **13**, 4294-4304.
- 16 [5] T. Xu, J. Wang, M. Wang, Y. Xue, J. Liu, N. Cai, W. Chen, F. Huang, X. Li and F.  
17 Yu, Ni(OH)<sub>2</sub>-Ag hybrid nanosheet array with ultralow Ag loading as a highly  
18 efficient and stable electrocatalyst for hydrogen evolution reaction, *New J. Chem.*,  
19 2021, **45**, 13286-13292.
- 20 [6] L. Zhang, Y. Jia, G. Gao, X. Yan, N. Chen, J. Chen, M. T. Soo, B. Wood, D. Yang  
21 and A. Du, Graphene defects trap atomic Ni species for hydrogen and oxygen  
22 evolution reactions, *Chem*, 2018, **4**, 285-297.
- 23 [7] J. Guo, W. Shang, J. Hu, C. Xin, X. Cheng, J. Wei, C. Zhu, W. Liu and Y. Shi,  
24 Synergistically enhanced single-atom nickel catalysis for alkaline hydrogen  
25 evolution reaction, *ACS Appl. Mater. Interfaces*, 2022, **14**, 29822-29831.
- 26 [8] Z. Cai, X. Bu, P. Wang, W. Su, R. Wei, J. C. Ho, J. Yang and X. Wang, Simple and  
27 cost effective fabrication of 3D porous core-shell Ni nanochains@NiFe layered  
28 double hydroxide nanosheet bifunctional electrocatalysts for overall water

- 1 splitting, *J. Mater. Chem. A*, 2019, **7**, 21722-21729.
- 2 [9] H. J. Qiu, Y. Ito, W. Cong, Y. Tan, P. Liu, A. Hirata, T. Fujita, Z. Tang and M.  
3 Chen, Nanoporous graphene with single-atom nickel dopants: an efficient and  
4 stable catalyst for electrochemical hydrogen production, *Angew. Chem. Int. Ed.*,  
5 2015, **54**, 14031-14035.
- 6 [10] H. Han, S. Park, D. Jang and W. B. Kim, N-doped carbon nanoweb-supported  
7 Ni/NiO heterostructure as hybrid catalysts for hydrogen evolution reaction in an  
8 alkaline phase, *J. Alloys Compd.*, 2021, **853**, 157338.
- 9 [11] X. Zhang and X. Du, Oxygen vacancies confined in nickel oxide nanoprism arrays  
10 for promoted electrocatalytic water splitting, *New J. Chem.*, 2020, **44**, 1703-1706.
- 11 [12] J. Wang, S. Mao, Z. Liu, Z. Wei, H. Wang, Y. Chen and Y. Wang, Dominating  
12 role of Ni<sup>0</sup> on the interface of Ni/NiO for enhanced hydrogen evolution reaction,  
13 *ACS Appl. Mater. Interfaces*, 2017, **9**, 7139-7147.
- 14 [13] Z. Jiang, L. Zheng, C. Sheng, H. Xu, S. Chen, Y. Liao, Y. Qing and Y. Wu,  
15 Construction of NiS/Ni<sub>3</sub>S<sub>4</sub> heteronanorod arrays in graphitized carbonized wood  
16 frameworks as versatile catalysts for efficient urea-assisted water splitting, *J.*  
17 *Colloid Interface Sci.*, 2022, **626**, 848-857.
- 18 [14] C. Gu, G. Zhou, J. Yang, H. Pang, M. Zhang, Q. Zhao, X. Gu, S. Tian, J. Zhang,  
19 L. Xu and Y. Tang, NiS/MoS<sub>2</sub> Mott-Schottky heterojunction-induced local charge  
20 redistribution for high-efficiency urea-assisted energy-saving hydrogen  
21 production, *Chem. Eng. J.*, 2022, **443**, 136321.
- 22 [15] N. Chen, X. Du and X. Zhang, Controlled synthesis of MnS/ZnS hybrid material  
23 with different morphology as efficient water and urea electrolysis catalyst,  
24 *Renewable Energy*, 2022, **193**, 715-724.
- 25 [16] J. Cao, Z. Jiao, R. Zhu, H. Long, Y. Zheng, J. Pan, J. Wang, F. Luo, C. Li and Q.  
26 Wei, Enhancing hydrogen evolution through urea electrolysis over Co-doped Ni-  
27 P-O film on nickel foam, *J. Alloys Compd.*, 2022, **914**, 165362.
- 28 [17] S. Wei, X. Wang, J. Wang, X. Sun, L. Cui, W. Yang, Y. Zheng and J. Liu, CoS<sub>2</sub>



- 1 nanoneedle array on Ti mesh: A stable and efficient bifunctional electrocatalyst for  
2 urea-assisted electrolytic hydrogen production, *Electrochim. Acta*, 2017, **246**, 776-  
3 782.
- 4 [18] Q. Zhang, F. M. D. Kazim, S. Ma, K. Qu, M. Li, Y. Wang, H. Hu, W. Cai and Z.  
5 Yang, Nitrogen dopants in nickel nanoparticles embedded carbon nanotubes  
6 promote overall urea oxidation, *Appl. Catal. B- Environ.*, 2021, **280**, 119436.
- 7 [19] C. Xiao, S. Li, X. Zhang and D. R. MacFarlane, MnO<sub>2</sub>/MnCo<sub>2</sub>O<sub>4</sub>/Ni  
8 heterostructure with quadruple hierarchy: a bifunctional electrode architecture for  
9 overall urea oxidation, *J. Mater. Chem. A*, 2017, **5**, 7825-7832.
- 10 [20] L. Wang, L. Ren, X. Wang, X. Feng, J. Zhou and B. Wang, Multivariate MOF-  
11 Templated Pomegranate-Like Ni/C as Efficient Bifunctional Electrocatalyst for  
12 Hydrogen Evolution and Urea Oxidation, *ACS Appl. Mater. Interfaces*, 2018, **10**,  
13 4750-4756.
- 14 [21] X. Wang, J. Wang, X. Sun, S. Wei, L. Cui, W. Yang and J. Liu, Hierarchical coral-  
15 like NiMoS nanohybrids as highly efficient bifunctional electrocatalysts for overall  
16 urea electrolysis, *Nano Res.*, 2018, **11**, 988-996.
